# Supplementary material for: ARCaDia: single-round screening of a DNA-type targeted covalent binder possessing a latent warhead
Source: Royal Society of Chemistry journal article supplement (doi:10.1039/d4cc04594g), 2024-01-01
Supplement: d4cc04594g1.xlsx [file d4cc04594g1.xlsx]

## Sheet: NoTarg
NoTarget_10K kmer analysis
143040/159031 reads accepted
Unique and nonunique kmer distribution
unique kmer		nonunique kmer	kmer
8 15		8 65518
9 17942		9 238017
10 357908		10 319187
11 811782		11 134853
12 950216		12 36682
13 932759		13 9343
14 872903		14 2714
15 802831		15 1156
16 730432		16 759
17 657503		17 626
18 584468		18 546
19 511417		19 474
20 438360		20 405
21 365301		21 337
22 292242		22 269
23 219183		23 201
24 146124		24 133
25 73063		25 66
Counts for each kmer top and 2nd seeds are highlighted
kmer 10	kmer 11	kmer 12	kmer 13	kmer 14	kmer 15	kmer 16	kmer 17	kmer 18
1 357908	1 811782	1 950216	1 932759	1 872903	1 802831	1 730432	1 657503	1 584468
2 198309	2 119923	2 35560	2 9243	2 2693	2 1143	2 749	2 617	2 538
3 81847	3 13539	3 1082	3 98	3 21	3 13	3 10	3 9	3 8
4 27792	4 1268	4 38	4 1	tgcgaactctctcc	tagtgcgcatcctag	tagtgcgcatcctagc	gcgccagcctagtgcgc	gcgccagcctagtgcgca
5 8404	5 116	5 2	ccatcgctgatgt	tagtgcgcatccta	gtgcgaactctctcc	gcgccagcctagtgcg	gcctagtgcgcatccta	gcctagtgcgcatcctag
6 2136	6 6	gcactatccact	5 1	gtgcgcatcctagc	gcgccagcctagtgc	gcctagtgcgcatcct	gccagcctagtgcgcat	gccagcctagtgcgcatc
7 560	tcgtgccctct	cgcactatccac	cgcactatccact	gtgcgaactctctc	gcctagtgcgcatcc	gccagcctagtgcgca	ctagtgcgcatcctagc	cgccagcctagtgcgcat
8 114	gtgcgcatcct			gcgccagcctagtg	gccagcctagtgcgc	ctagtgcgcatcctag	cgccagcctagtgcgca	cctagtgcgcatcctagc
9 20	gctacatcttg			gcctagtgcgcatc	ctagtgcgcatccta	cgccagcctagtgcgc	cctagtgcgcatcctag	ccagcctagtgcgcatcc
10 2	cactatccact			gccagcctagtgcg	cgccagcctagtgcg	cctagtgcgcatccta	ccagcctagtgcgcatc	cagcctagtgcgcatcct
ttggatgggg	attgctgttgc			gcagacttctgagc	cctagtgcgcatcct	ccagcctagtgcgcat	cagcctagtgcgcatcc	agcctagtgcgcatccta
acatcttggg	acatcttgggc			ctgggaaccgtttt	ccattatgtgtgggg	cagcctagtgcgcatc	agcctagtgcgcatcct
11 3	7 1			ctagtgcgcatcct	ccagcctagtgcgca	agcctagtgcgcatcc
ttggtgtggg	tacatcttggg			cgccagcctagtgc	cagcctagtgcgcat
ttgggggggg				cctagtgcgcatcc	agtgcgcatcctagc
acaactgcgt				ccattatgtgtggg	agcctagtgcgcatc
				ccagcctagtgcgc
				cattatgtgtgggg
				cagcctagtgcgca
				caattgccggggat
				agtgcgcatcctag
				agcctagtgcgcat
				aactttgactagac
				aacccaatcgaatg
kmer 10 seed
10 2	seed	ttggatgggg		seed	acatcttggg				seed	ttggtgtggg		seed	ttgggggggg		seed	acaactgcgt
ttggatgggg	6210	CCCAACCGCCTTTGGATGGGGTGGC		ACGGTAGAAACATCTTGGGCTATCC					8754	ACGCAAGGATATTTGGTGTGGGGCT		870	ACTTTGAGCTGTTGGGGGGGGCACT		5146	AGTGACAACAACTGCGTGGGTCGCC
acatcttggg	8917	TGCTCAGCCTCTTTGGATGGGGCTT		GGCCGAATACATCTTGGGGACCAGA					10195	ATACCCAAACATTGGTGTGGGGGCC		9896	ACGGCTAGTATTTGGGGGGGGTATC		5677	AGTACAACTGCGTTGGAGGTAACAC
11 3	12733	CTCGGCATATAGTTGGATGGGGTAA		CGCCCATACATCTTGGGCGGATCCA					15661	GGAGTAGAAAATTTGGTGTGGGCGA		14181	AACGGTATCACCTTGGGGGGGGTGT		17202	ACAACAACTGCGTGGGAGGGGCTGC
ttggtgtggg	24197	GGAATAGCCACTTGGATGGGGAGTA		GGGGTGACATCTTGGGTCCGGGTTC					19230	CGATCCGCTGGTTCTTGGTGTGGGA		17809	CGTATCTGGGTCTCTTGGGGGGGGG		19725	CCAAGTAACAACTGCGTTCCGGTGC
ttgggggggg	25643	ACCCTGGGCCATTGGATGGGGGGTA		AATAAGTACATCTTGGGCGTGGATA					23267	GCGTCACTGCCTTGGTGTGGGTCCT		20348	TCCGGGGTGTGTTGGGGGGGGTAGG		20190	GCGCCGTACAACTGCGTTACATGTA
acaactgcgt	32908	TCCCACCCCGCTTTGGATGGGGCTG		AGCAGCTACATCTTGGGCTACTTTA					32281	GATACGGCACGCTTGGTGTGGGCTG		22650	TGCAGCATGCCCTTGGGGGGGGAGT		28195	GCATACCACAACTGCGTGAATCCCT
	44611	GACTACGTTGGATGGGGCCTCAAGA		TGGAGTACATCTTGGGAGGTGACGT					32530	CAGCGGATGTTTTGGTGTGGGGCAC		32897	CAGTGAAGTCCATTGGGGGGGGCCC		35713	TCAACAACTGCGTACAACTTCATTA
	45622	CACTGAGCTAATTGGATGGGGTGGA		TCCTTCAACATCTTGGGCAGGGACT					38242	CCGGCAACAGATTTTGGTGTGGGCC		38034	CATGCGCGATATTGGGGGGGGTATG		58663	GATACAACTGCGTCGTAATTGCGCA
	50295	TGCTGTGCCCTTTGGATGGGGAACA		TACGGAGCTACATCTTGGGGGACGA					46274	ATGCAAGCTCGCTTGGTGTGGGGGA		40741	CTACGGCATTAATGCTTGGGGGGGG		59438	GATGACAGCGGCTAGACAACTGCGT
	54798	TGGGAGACTACATTGGATGGGGTAT		AGACGCTACATCTTGGGCTCACGCG					46672	AGCTACATAACATTGGTGTGGGTGG		59395	TACCAATTACTCTTGGGGGGGGCGT		66651	CCACAACTGCGTTACCGGGCTGGTG
									67665	TCTTACGTCTGTTGGTGTGGGTTTG		63355	ACCGCGCGCCAGTTGGGGGGGGGAA		69122	TGCTACCACAACTGCGTGAGATGGT
kmer 11 seed
6 6	seed	tacatcttggg
tcgtgccctct	14902	GGCCGAATACATCTTGGGGACCAGA
gtgcgcatcct	21394	CGCCCATACATCTTGGGCGGATCCA
gctacatcttg	33824	AATAAGTACATCTTGGGCGTGGATA
cactatccact	35088	AGCAGCTACATCTTGGGCTACTTTA
attgctgttgc	35751	TGGAGTACATCTTGGGAGGTGACGT
acatcttgggc	49956	TACGGAGCTACATCTTGGGGGACGA
7 1	54256	AGACGCTACATCTTGGGCTCACGCG
tacatcttggg
kmer 12 seed	seed	gcactatccact		seed	cgcactatccac
5 2	10441	GGGCTCGCACTATCCACTTGGCCTC		10441	GGGCTCGCACTATCCACTTGGCCTC
gcactatccact	22673	AAAGACCCGCACTATCCACTGGGAA		22673	AAAGACCCGCACTATCCACTGGGAA
cgcactatccac	38802	TGTTACGCACTATCCACTTGGCTTA		38802	TGTTACGCACTATCCACTTGGCTTA
	42726	ACCGCACCGCACTATCCACTGTCTT		42726	ACCGCACCGCACTATCCACTGTCTT
	47152	TAGTTCGCACTATCCACTCTTTGGT		47152	TAGTTCGCACTATCCACTCTTTGGT
kmer 13	seed	ccatcgctgatgt		seed	cgcactatccact
4 1	3800	CCATCGCTGATGTCAATACGCTCTG		10441	GGGCTCGCACTATCCACTTGGCCTC
ccatcgctgatgt	27022	CCATCGCTGATGTACGAATGAATAC		22673	AAAGACCCGCACTATCCACTGGGAA
5 1	44827	TCTGTCCATCGCTGATGTGTCCTAA		38802	TGTTACGCACTATCCACTTGGCTTA
cgcactatccact	67521	GGACCAACACCATCGCTGATGTACG		42726	ACCGCACCGCACTATCCACTGTCTT
				47152	TAGTTCGCACTATCCACTCTTTGGT

## Sheet: AFS100K
Thrombin_AFS 100K kmer analysis
641612/751978 reads accepted
Unique and nonunique kmer distribution
unique kmer		nonunique kmer	kmer
		8 65536	8
9 530		9 261413	9
10 63185		10 952841	10
11 1058691		11 1987414	11
12 3747856		12 1863995	12
13 6092466		13 967982	13
14 6929143		14 359318	14
15 6811085		15 118611	15
16 6327589		16 43138	16
17 5732749		17 20636	17
18 5106519		18 13126	18
19 4471499		19 9863	19
20 3833910		20 7860	20
21 3195497		21 6265	21
22 2556777		22 4823	22
23 1917820		23 3499	23
24 1278706		24 2253	24
25 639472		25 1067	25
Counts for each kmer top and 2nd seeds are highlighted
kmer12	kmer 13	kmer 14	kmer15	kmer16	kmer17	kmer18	kmer19
1 3747856	1 6092466	1 6929143	1 6811085	1 6327589	1 5732749	1 5106519	1 4471499
2 1143688	2 765945	2 321852	2 112322	2 41696	2 20249	2 13008	2 9804
3 394478	3 142212	3 29956	3 5061	3 1081	3 318	3 111	3 59
4 157973	4 36952	4 4992	4 663	4 171	4 49	4 7	tggcagcaagatactagcg
5 72745	5 12238	5 1345	5 231	5 81	5 13	gtggatggtggggttggt	tgcggagtgttaaggggat
6 37396	6 5144	6 515	6 122	6 54	6 5	ggtggttggtgtgggtgg	tgcagggtgctaccattgg
7 20531	7 2282	7 200	7 44	7 20	7 1	ggtgggtggtgtggttgg	tgagacgtgatggtgtctt
8 12083	8 1216	8 139	8 43	8 10	gggtggggaggatggtg	ggtggatggtggggttgg	gtggcagcaagatactagc
9 7629	9 641	9 70	9 29	9 9	9 1	gggtggggaggatggtgg	gtgcggagtgttaagggga
10 4881	10 391	10 46	10 17	10 5	ggggtggtgtgggtggc	gggggatggtgtggttgg	ggtggatggtggggttggt
11 3343	11 241	11 46	11 24	11 4		gcaggatggtgtgggtgg	ggtgcggagtgttaagggg
12 2309	12 147	12 29	12 9	12 4			ggtaggcgctagaagtgga
13 1651	13 116	13 19	13 9	13 2			gggtgctaccattggtgcg
14 1191	14 100	14 25	14 6	gggtggtgtggttggg			gggtaggcgctagaagtgg
15 821	15 64	15 12	15 3	ggggtggtgtggttgg			gggggttgtacaggcgggt
16 606	16 33	16 10	16 7	14 1			gggggttggtgtgggtggc
17 484	17 45	17 8	17 3	ggggtggtgtgggtgg			gggcggttctgtaggctgt
18 391	18 36	18 6	18 2				ggcggttctgtaggctgta
19 288	19 29	19 6	19 4				ggcgcaatcattctaggcg
20 231	20 21	20 7	20 2				ggcagcttaggcaggggtt
21 196	21 21	21 4	22 1				ggcagcaagatactagcga
22 175	22 12	22 4	23 1				ggagtgttaaggggatgca
23 130	23 13	23 4	25 3				ggagaggcagcttaggcag
24 91	24 10	24 2	27 3				gctgcagggtgctaccatt
25 83	25 9	25 3	28 1				gctgagacgtgatggtgtc
26 76	26 7	27 3	ggatggtgtgggtgg				gcggttctgtaggctgtat
27 68	27 6	28 3	36 1				gcgggttggaggggttgga
28 51	28 7	29 1	gggtggtgtggttgg				gcggagtgttaaggggatg
29 40	29 5	30 4					gcgcaatcattctaggcgg
30 42	30 5	32 3					gcagggtgctaccattggt
31 40	31 7	35 1					gcagcttaggcaggggttg
32 29	32 3	38 1					gcagcaagatactagcgag
33 19	33 4	39 1					gcaatcattctaggcggta
34 23	34 5	ggtggtgtggttgg					gcaagatactagcgagcga
35 25	36 3	46 1					gagtgttaaggggatgcat
36 20	37 2	ggttggggggttgg					gaggcagcttaggcagggg
37 18	38 1						gagaggcagcttaggcagg
38 14	39 1						gagacgtgatggtgtcttg
39 13	40 2						gacgtgatggtgtcttgtc
40 6	41 1						ctgcagggtgctaccattg
41 13	42 2						ctgagacgtgatggtgtct
42 6	43 1						cggttctgtaggctgtatc
43 7	48 1						cgggtaggcgctagaagtg
44 11	gttggggggttgg						cggcgcaatcattctaggc
45 5	52 1						cggcgaagtatgtggaagg
46 7	ggttggggggttg						cggagtgttaaggggatgc
47 5							cgcaatcattctaggcggt
48 8							cagggtgctaccattggtg
49 9							cagggggatggtgtggttg
50 5							caggcgggtgcgtaagtgg
51 3							cagcaagatactagcgagc
52 1							caatcattctaggcggtag
53 2							aggtggttggtgtgggtgg
54 3							agggtgctaccattggtgc
55 2							agggggatggtgtggttgg
56 6							aggcagcttaggcaggggt
58 1							agcggtggtatggggcgtg
59 3							agcaagatactagcgagcg
60 3							agaggcagcttaggcaggg
63 1							agacgtgatggtgtcttgt
64 2							acgtgatggtgtcttgtct
66 2							acggcgcaatcattctagg
69 2
70 1
72 2
74 1
75 1
80 1
81 1
98 1
110 1
tggtgtggttgg
124 1
tggtgtgggtgg
NGS reads searched for the Kmer top and 2nd seed sequences
kmer 12 seeds
tggtgtggttgg		seed tggtgtggttgg (2nd)			seed tggtgtgggtgg (top)
tggtgtgggtgg		432716	CGTTGGTGTGGTTGGGGGTGTCCTG		155638	GTACAAGGGGGCTGGTGTGGGTGGA
		407534	CAAGTGGGTGGTTGGTGTGGTTGGA		428668	GGTTGGTGTGGGTGGTAGTAGATAA
		407867	GTTGCAGGGGGATGGTGTGGTTGGT		421376	GGGTGGTGTGGGTGGCCAAGCTTGG
		469756	GGTGAGGGGGGTTGGTGTGGTTGGC		437644	ACAGGGATGGTGTGGGTGGCGTCGC
		462526	GGGTGGTGTGGTTGGGAACGTCGAG		439180	GAACAGGGGGGTTGGTGTGGGTGGC
		461177	GAGTGCAGAGGGTGGTGTGGTTGGG		408186	TAATAGGGTGGATGGTGTGGGTGGT
		442228	GACGGGGTGGTGTGGTTGGCGATGG		403166	AGATAGGCGGGGTGGTGTGGGTGGC
		444192	GGTGGAGGGGGGTGGTGTGGTTGGA		404985	GAGTAGTAGGGATGGTGTGGGTGGC
		460510	ACCGATAATGGATGGTGTGGTTGGT		404648	ACGCATCACGACTGGTGTGGGTGGC
		455298	ACCGAAGCGGGGTGGTGTGGTTGGC		416745	ATGATGCGAGGGTGGTGTGGGTGGA
		343362	CCGTGGTGTGGTTGGTTCGGGTGGG		466959	GGAGTGAGCGGGTGGTGTGGGTGGG
		359803	AATGGGGTTGGTTGGTGTGGTTGGA		468719	CCTGAAGGTGGTTGGTGTGGGTGGA
		322784	GGGGTGGTGTGGTTGGGGCGTCCCC		469446	CATTGTTTGGGTTGGTGTGGGTGGC
		321717	GCAGGGAGGGGTTGGTGTGGTTGGA		477256	CTTGCAGGGTGGTGTGGGTGGGCGC
		337428	GGGCGGGTGGTGTGGTTGGAGGGCC		471465	GTCCTGTGAGGATGGTGTGGGTGGA
		330935	GCCGGGTTGGTGTGGTTGGCTAGGT		348302	CGGCAGGGGGAATGGTGTGGGTGGG
		393375	AGTGTGCAAGGATGGTGTGGTTGGA		348174	ACCTGCGCAGGGTGGTGTGGGTGGT
		393683	GGGGTGGTGTGGTTGGGGGTGGTGT		348309	ACGAATGTGGTGTGGGTGGACAACT
		394299	GTCCTCGGCGGGTGGTGTGGTTGGG		342257	AATGCGGATCGGTGGTGTGGGTGGC
		367538	ACTAGGCTGGTGTGGTTGGGGACGA		340904	TGGTGCGGGGGGTGGTGTGGGTGGC
		366533	AGGTGCGATGGCTGGTGTGGTTGGT		360124	GCCAATGCAGGATGGTGTGGGTGGT
		370539	GCGGTGGGTGGGTGGTGTGGTTGGA		355190	CAGGACGTGGTGTGGGTGGCAGAAT
		370905	ACTGTCAAGGGTTGGTGTGGTTGGC		329885	AAGTAGATCGGCTGGTGTGGGTGGC
		589121	GGTTGGTGTGGTTGGACTCTTCCGA		323349	GCATAGAGGGGCTGGTGTGGGTGGA
		584433	GGGTGGTGTGGTTGGGGGGCGGGTA		338803	ACACGCAGCGTTTGGTGTGGGTGGG
		595183	CAAAAGGTAGGGTGGTGTGGTTGGG		389640	GCCTGGGGGGAATGGTGTGGGTGGG
		595556	AACGTGATGGGATGGTGTGGTTGGC		394586	CGGCGCTGTTGGTGTGGGTGGGGAG
		564130	TATAGGCGCGGTTGGTGTGGTTGGG		368025	GGGTAGGGGTGGTGTGGGTGGCATC
		579195	ACGGGAGGCGGCTGGTGTGGTTGGT		380752	TGCTTAAGGGGATGGTGTGGGTGGG
		616741	GCTGTTGATGGATGGTGTGGTTGGC		586441	GCAGCGGGGGTTTGGTGTGGGTGGG
		612245	GGCTGGTGTGGTTGGATCGGGTGGT		584962	TGGTGTGGGTGGTTAGTTGACACCA
		613990	TGCAGGGAGGGGTGGTGTGGTTGGG		600184	GCGGTAGGTTGGTGTGGGTGGCGGC
		507332	ACATGGTTGGGGTGGTGTGGTTGGC		592384	GACGCCGAGTGGTGTGGGTGGGGTC
		505363	TGCAGAGACGGCTGGTGTGGTTGGC		593449	AAACCCGGCGGATGGTGTGGGTGGG
		520278	GGCTGAGGGCGTTGGTGTGGTTGGC		592028	TTGAGGGGGTGGTGTGGGTGGTTTA
		513990	AGGGCAGGGGGATGGTGTGGTTGGT		562709	GCTAGGATGGTGTGGGTGGGTGGCA
		488222	GGGTGGTGTGGTTGGGGGCGGGAGA		580687	AGAGCGGTGGTGTGGGTGGGTGGGG
		484448	GCTTTGGTGTGGTTGGTGGGGTTGG		628227	ATGCAGGGTTGGTGGTGTGGGTGGC
		492638	CCGCGGCTGGGGTGGTGTGGTTGGA		625379	AATGCAGCAGGATGGTGTGGGTGGG
		494191	GAGGAAGTGGTGTGGTTGGTGCTGG		623741	CGCTGAGGTGGTTGGTGTGGGTGGG
		560306	ATGGAAAGGGGATGGTGTGGTTGGA		632663	GGGGTGCTCGGATGGTGTGGGTGGC
		559544	GAACGAAATGGTTGGTGTGGTTGGA		633624	CGAACGAATGGATGGTGTGGGTGGG
		551404	GGGTGGTGTGGTTGGCTGATGTAGC		633884	TGGGAAGCAGGATGGTGTGGGTGGC
		526181	GGTGTGTGTGGATGGTGTGGTTGGA		617165	GGGTGAGAAGGATGGTGTGGGTGGT
		526641	TGCTCAGGGGCATGGTGTGGTTGGT		612030	GTGCCTGGGGGGTGGTGTGGGTGGC
		537335	GAGGCCGGTGGGTGGTGTGGTTGGT		614368	GCGGGGACAGGGTGGTGTGGGTGGT
		107081	GGGCACAGGGGCTGGTGTGGTTGGC		510086	GGGGGGTTGGTGTGGGTGGCAGTTC
		107693	CGTGGAAGCGGATGGTGTGGTTGGT		501960	GGGATGGGGTGGTGTGGGTGGAAGG
		105998	GGGTGGTGTGGTTGGGCATTGCGTA		520659	ACTGGCTGGAGCTGGTGTGGGTGGG
		101411	ACCATGGAAGGTTGGTGTGGTTGGT		515530	GCGTGTGGCTGGTGTGGGTGGAAAA
		89023	CATGCGGACGGGTGGTGTGGTTGGA		514663	GCTGAGGGTTGGTGTGGGTGGTGGT
		90082	GGGTGGTGTGGTTGGAACTGCGCGA		483071	GGTAAACTGGGCTGGTGTGGGTGGG
		80782	GGGGGCGAAGGGTGGTGTGGTTGGA		500673	GGCGGGGGTTGGTGTGGGTGGCCGA
		91858	ACAGCAGAGGGATGGTGTGGTTGGC		500878	GCAGGAATGGTATGGTGTGGGTGGT
		90226	GGGAGGCGAGGGTGGTGTGGTTGGT		541603	GGTGGACCATGGTGTGGGTGGGAGA
		91328	AGCGGAGGTGGGTGGTGTGGTTGGC		559091	GGTTGGTGTGGGTGGGAGGTCTGCA
		92907	GCCGGGGTGGTGTGGTTGGCTAGAT		524047	AAATGCGGATGGTGTGGGTGGGAAT
		146251	GAACCGGTGGGTTGGTGTGGTTGGG		531109	GCGGTTGGAGGCTGGTGTGGGTGGG
		141187	GTAAGTGATGGCTGGTGTGGTTGGT		534143	GGGGGAAGCTGGTGTGGGTGGAAAG
		156579	TGGTGCAGGTGGTGGTGTGGTTGGC		100466	GCTGCAGGTGGTTGGTGTGGGTGGC
		153854	GGTTGGTGTGGTTGGGTGCTCCTAT		119560	CGGTATAGCGGATGGTGTGGGTGGG
		126249	AGATGAGGGGGCTGGTGTGGTTGGC		118552	ACCAGGGTGGTGTGGGTGGTGTCCC
		128763	AGGGGATGGGGATGGTGTGGTTGGC		113754	GGTTGGTGTGGGTGGTGTGTCGCTG
		124655	TCGGTCGCTGGTTGGTGTGGTTGGT		83149	AGCGGGATATGATTGGTGTGGGTGG
		138571	GGGGAGCAGGGGTGGTGTGGTTGGA		94520	GATGCAGTGGGTTGGTGTGGGTGGC
		138760	GGCGGCGGGGGTTGGTGTGGTTGGA		147471	GCGATAGTTGGTTGGTGTGGGTGGT
		37412	CGCCGGTTGGGATGGTGTGGTTGGA		149584	CCGTCGCGACTCTGGTGTGGGTGGG
		38849	TGAGTCCAGGGTTGGTGTGGTTGGT		143199	AGGTGGTGTGGGTGGTGGGGGGTCT
		31988	GGCTGGTGTGGTTGGTGGGTCGCTT		160254	GGTGCTATCGGCTGGTGTGGGTGGG
		6047	GGCTCGTCGCGTTGGTGTGGTTGGA		155376	AGATGGAGCGGTTGGTGTGGGTGGG
		9395	CAGTGAGGCCGTTGGTGTGGTTGGC		126733	CCGCGGGATGGCTGGTGTGGGTGGG
		7882	GGACGGATGGTGTGGTTGGGACAGG		125327	AACGGCGGTGGATGGTGTGGGTGGT
		780	CAAGTGCTCTGGTGTGGTTGGATAG		137208	AGGTCGCAGGGGTGGTGTGGGTGGC
		4645	TGGGGGTACGGTTGGTGTGGTTGGA		135266	TGGCTGGTGGGATGGTGTGGGTGGC
		3045	CGTGAGTGTGGGTGGTGTGGTTGGG		39604	GACGGATGGGGATGGTGTGGGTGGG
		3293	GAGGCAGGCGGTTGGTGTGGTTGGC		32465	GCTGGGGTGGTGTGGGTGGGTTTGT
		3346	GGGGTCAATGGGTGGTGTGGTTGGC		34189	TGCCCAAGGGGATGGTGTGGGTGGG
		10986	GCAGGCATGGGTTGGTGTGGTTGGC		66264	TGGGTAGGGGGATGGTGTGGGTGGC
		67927	GGTGTAAGGGGGTGGTGTGGTTGGA		61067	GAGTCGGTGGGATGGTGTGGGTGGC
		76166	GGCAGAGTTCGGTGGTGTGGTTGGC		71735	GGCAGGCTGGTGTGGGTGGGATGGG
		70850	GCCGAGGGGGGATGGTGTGGTTGGG		71210	GGAGAGCAGGGGTGGTGTGGGTGGC
		74291	AAGCAGTGGGGTTGGTGTGGTTGGA		75094	GGAGGACAGGGGTTGGTGTGGGTGG
		54366	GGGCGGCAGGGGTGGTGTGGTTGGC		45631	CCGAGTGTGGTGTGGGTGGGAATAA
		268325	ACGGTGGTGTGGTTGGTGGAAGACC		46182	CTTGCAGCGGGTTGGTGTGGGTGGA
		271887	TGTGCAGTCGGTTGGTGTGGTTGGA		42425	ACGGCTGGAGGTTGGTGTGGGTGGC
		274882	GGGATAGGTGGGTGGTGTGGTTGGT		55990	GCTTGGTGTGGGTGGGCGGTGGTGC
		249839	GGGTGGTGTGGTTGGAAAGGGGGTG		53876	GGTGGACGGGGTTGGTGTGGGTGGA
		317408	GACGCAAGGGGTTGGTGTGGTTGGT		263392	CGCTGGTGTGGGTGGTGGGCATTCC
		319939	TGGTGTGGTTGGTGCAGCTGCGGGC		276260	GGGTGTGGAGGTTGGTGTGGGTGGT
		318321	GATGGTGACGGATGGTGTGGTTGGA		272373	TCTGCCGGGTGGTGTGGGTGGGCCG
		314622	GGGTGGTGTGGTTGGCGCTTCGAGA		273666	TGGACGGCAGGATGGTGTGGGTGGG
		286391	GGCGGGAACGGTTGGTGTGGTTGGA		247458	GGCTGGTGTGGGTGGATGGGGTGGC
		286546	GAGCAGACGGGATGGTGTGGTTGGT		245771	GGGTGGTGTGGGTGGTGCATGCGAC
		290028	GTGGAGGGGTGGTGTGGTTGGCATC		241155	GAAGGAGAGGGATGGTGTGGGTGGA
		298522	GACTGAATGGGTTGGTGTGGTTGGT		258209	ACGGGGGAGGGATGGTGTGGGTGGA
		298306	GATGGGTTGGTGTGGTTGGAGTCGC		308051	GCGGAATAGGGATGGTGTGGGTGGC
		293429	GGGAGGCGAGGCTGGTGTGGTTGGT		310054	GTGGTAGCGGGTTGGTGTGGGTGGA
		191035	GCATAAGTTCGTTGGTGTGGTTGGA		317549	GGTGACGAGGGGTGGTGTGGGTGGA
		193466	GATGGGGGCGGATGGTGTGGTTGGT		318167	GCCATAGCATGGTGTGGGTGGTAGG
		193051	GGAGGGGGCTGGTGTGGTTGGCGGA		316474	AGTGCCTCTGGGTGGTGTGGGTGGT
		168236	ACTGAGCTCGGATGGTGTGGTTGGA		313186	GGGTGGTGTGGGTGGAGGCTCGAGG
		221918	CCCCATCTAGGTTGGTGTGGTTGGA		287661	TGCGGCGGGGGATGGTGTGGGTGGA
		225353	GGGTGGTGTGGTTGGGGTGCGTGTG		295818	GCGCGGAGGCGATGGTGTGGGTGGA
		235631	TGGTGCGGAGGATGGTGTGGTTGGT		295888	GGTGAACGGGGTTGGTGTGGGTGGG
		231375	AGGGCAGCGGGATGGTGTGGTTGGC		186980	AACTGGTGTGGGTGGTGTGATAGGC
		209472	GTGACGGCGTGGTGTGGTTGGCCGG		189569	GAGAGGCGGGATTGGTGTGGGTGGA
		201630	AACGGCATGGTGTGGTTGGACGGGA		181742	CCCACGGTCGCCTGGTGTGGGTGGT
		205183	AGCACAGGGGGATGGTGTGGTTGGG		197649	CAGGCGGTGGGGTGGTGTGGGTGGC
		219137	AGCGGAATAGGGTGGTGTGGTTGGG		196533	GGGTGGCCTAGGTGGTGTGGGTGGG
		212188	TGGCAGGTCGGATGGTGTGGTTGGC		198507	GGATGGTGTGGGTGGGGAGGGGAAC
					167217	GGGTGGTGTGGGTGGGCTGGGCCTG
					166392	GGCGAAGGTTGGTGTGGGTGGCTGT
					161547	GGTTGGTGTGGGTGGTTCAGTGATG
					177285	CGCTGAGCAAGGTTGGTGTGGGTGG
					174026	GTTACATAGGGGTGGTGTGGGTGGT
					227153	AAGCAGGGTGGTTGGTGTGGGTGGT
					227837	TGGCTGCTGGGTTGGTGTGGGTGGA
					230270	AGCAGCAGGGGGTGGTGTGGGTGGC
					229209	AGACTGCTGGGGTGGTGTGGGTGGC
					201672	ACGCGTGGGTGGTGTGGGTGGTTCT
					216492	GGCGGGGTTTGGTGTGGGTGGCCGC
					210903	GAATGGCTAGGATGGTGTGGGTGGT
					211560	GCAGGGGGCCGCTGGTGTGGGTGGT
kmer 13 seed				seed gttggggggttgg (2nd)				seed ggttggggggttg (top)
gttggggggttgg			426554	GCACCAGGTGGTTGGGGGGTTGGGT				426554	GCACCAGGTGGTTGGGGGGTTGGGT
ggttggggggttg			424989	GCGCAGCGGGGTTGGGGGGTTGGGC				424989	GCGCAGCGGGGTTGGGGGGTTGGGC
			419542	GGTCGAGGCGGTTGGGGGGTTGGAT				419542	GGTCGAGGCGGTTGGGGGGTTGGAT
			470315	CGGACTGGCTGGTTGGGGGGTTGGA				470315	CGGACTGGCTGGTTGGGGGGTTGGA
			460318	CGGCAAGCTGGTTGGGGGGTTGGTA				460318	CGGCAAGCTGGTTGGGGGGTTGGTA
			452062	AGCAAGGCTGGGTTGGGGGGTTGGT				452062	AGCAAGGCTGGGTTGGGGGGTTGGT
			351241	GGGGTTGGGGGGTTGGGTGCGGATA				351241	GGGGTTGGGGGGTTGGGTGCGGATA
			388976	GATGGAATGGGTTGGGGGGTTGGCG				388976	GATGGAATGGGTTGGGGGGTTGGCG
			378505	GGCGGTAGAGGTTGGGGGGTTGGGC				377424	ACTGCGACTGGTTGGGGGGTTGTGG
			587960	GCAGGGTGTGGTTGGGGGGTTGGAC				378505	GGCGGTAGAGGTTGGGGGGTTGGGC
			577636	GCAGTAGGGGGTTGGGGGGTTGGAC				587960	GCAGGGTGTGGTTGGGGGGTTGGAC
			579182	GGCGTCGGACGGTTGGGGGGTTGGG				577636	GCAGTAGGGGGTTGGGGGGTTGGAC
			572825	GCAGGGAGTGGTTGGGGGGTTGGAG				578112	GCCGCGGAGGGTTGGGGGGTTGCTG
			602492	GGGTTGGGGGGTTGGAGTAGCATGA				579182	GGCGTCGGACGGTTGGGGGGTTGGG
			602973	GTGCATATGGGTTGGGGGGTTGGGA				572825	GCAGGGAGTGGTTGGGGGGTTGGAG
			508423	TCGAGCATAGGTTGGGGGGTTGGGC				602492	GGGTTGGGGGGTTGGAGTAGCATGA
			519512	GGCGATGTGGGTTGGGGGGTTGGGG				602973	GTGCATATGGGTTGGGGGGTTGGGA
			512063	ATTAAGCTGGGTTGGGGGGTTGGGC				508423	TCGAGCATAGGTTGGGGGGTTGGGC
			490377	GCGAAGACTGGTTGGGGGGTTGGTT				519512	GGCGATGTGGGTTGGGGGGTTGGGG
			497600	ACTCGGCGTGGTTGGGGGGTTGGAG				512063	ATTAAGCTGGGTTGGGGGGTTGGGC
			547680	GGTGGCAGTGGTTGGGGGGTTGGAT				490377	GCGAAGACTGGTTGGGGGGTTGGTT
			549211	GGTGCACTGGGTTGGGGGGTTGGGG				497600	ACTCGGCGTGGTTGGGGGGTTGGAG
			551196	AGAACAGGTGGTTGGGGGGTTGGGA				547680	GGTGGCAGTGGTTGGGGGGTTGGAT
			100677	GCTCTGGTCGGGTTGGGGGGTTGGA				549211	GGTGCACTGGGTTGGGGGGTTGGGG
			80615	CGGTTGGGGGGTTGGAGCTTTCGGT				557302	ACGACTCGCGGTTGGGGGGTTGTGA
			142965	GGGTTGGGGGGTTGGGTAAACCTGA				551196	AGAACAGGTGGTTGGGGGGTTGGGA
			158698	GCAAGAGTGGGTTGGGGGGTTGGTT				521687	GTAGCGCCGGGGTTGGGGGGTTGTT
			153177	GGGTTGGGGGGTTGGGTAGAACTAG				100677	GCTCTGGTCGGGTTGGGGGGTTGGA
			140104	ACGGTTGGGGGGTTGGGAGCGTTTG				80615	CGGTTGGGGGGTTGGAGCTTTCGGT
			39887	GCGGTTGGGGGGTTGGGCGTGCTGG				142965	GGGTTGGGGGGTTGGGTAAACCTGA
			39852	GTGTGAGTAGGTTGGGGGGTTGGCA				158698	GCAAGAGTGGGTTGGGGGGTTGGTT
			38626	CGGTTGGGGGGTTGGGGAAATGCAA				153177	GGGTTGGGGGGTTGGGTAGAACTAG
			32651	TCCGAGGTGGGTTGGGGGGTTGGGT				122976	AACACGGACGGTTGGGGGGTTGTGC
			4819	ACGGTTGGGGGGTTGGGAGGATCAA				140104	ACGGTTGGGGGGTTGGGAGCGTTTG
			16777	ATCCGCGCAGGTTGGGGGGTTGGGG				39887	GCGGTTGGGGGGTTGGGCGTGCTGG
			18353	GGGTTGGGGGGTTGGGCGTGCTACT				39852	GTGTGAGTAGGTTGGGGGGTTGGCA
			11815	TGTGGCGTAGGTTGGGGGGTTGGAC				38626	CGGTTGGGGGGTTGGGGAAATGCAA
			262580	AGTGTGGTGGGTTGGGGGGTTGGAT				32651	TCCGAGGTGGGTTGGGGGGTTGGGT
			260839	GCAGCAATAAGTTGGGGGGTTGGTA				4819	ACGGTTGGGGGGTTGGGAGGATCAA
			247562	GAGAGAAGCGGTTGGGGGGTTGGAT				16777	ATCCGCGCAGGTTGGGGGGTTGGGG
			244804	GGGTTGGGGGGTTGGTGGTCAGTGA				18353	GGGTTGGGGGGTTGGGCGTGCTACT
			289202	GCACAAGGTGGTTGGGGGGTTGGCA				11815	TGTGGCGTAGGTTGGGGGGTTGGAC
			176284	AGGTTGGGGGGTTGGGTCTTGCAGA				262580	AGTGTGGTGGGTTGGGGGGTTGGAT
			178195	GCCGAAGTTGGTTGGGGGGTTGGGA				247562	GAGAGAAGCGGTTGGGGGGTTGGAT
			224540	GCAGGGCATGGTTGGGGGGTTGGCG				244804	GGGTTGGGGGGTTGGTGGTCAGTGA
			206323	GGGTTGGGGGGTTGGGAGCGAAGGA				301680	GGTGGGCAGTGGTTGGGGGGTTGCG
			208559	GTGTACGGTCGTTGGGGGGTTGGAG				289202	GCACAAGGTGGTTGGGGGGTTGGCA
			211162	GGTGGGGTTGGTTGGGGGGTTGGCT				176284	AGGTTGGGGGGTTGGGTCTTGCAGA
								178195	GCCGAAGTTGGTTGGGGGGTTGGGA
								224540	GCAGGGCATGGTTGGGGGGTTGGCG
								206323	GGGTTGGGGGGTTGGGAGCGAAGGA
								211162	GGTGGGGTTGGTTGGGGGGTTGGCT
kmer14 seed			seed ggtggtgtggttgg (2nd)						seed ggttggggggttgg (top)
ggtggtgtggttgg			462526	GGGTGGTGTGGTTGGGAACGTCGAG				426554	GCACCAGGTGGTTGGGGGGTTGGGT
ggttggggggttgg			461177	GAGTGCAGAGGGTGGTGTGGTTGGG				424989	GCGCAGCGGGGTTGGGGGGTTGGGC
			442228	GACGGGGTGGTGTGGTTGGCGATGG				419542	GGTCGAGGCGGTTGGGGGGTTGGAT
			444192	GGTGGAGGGGGGTGGTGTGGTTGGA				470315	CGGACTGGCTGGTTGGGGGGTTGGA
			455298	ACCGAAGCGGGGTGGTGTGGTTGGC				460318	CGGCAAGCTGGTTGGGGGGTTGGTA
			322784	GGGGTGGTGTGGTTGGGGCGTCCCC				452062	AGCAAGGCTGGGTTGGGGGGTTGGT
			337428	GGGCGGGTGGTGTGGTTGGAGGGCC				351241	GGGGTTGGGGGGTTGGGTGCGGATA
			393683	GGGGTGGTGTGGTTGGGGGTGGTGT				388976	GATGGAATGGGTTGGGGGGTTGGCG
			394299	GTCCTCGGCGGGTGGTGTGGTTGGG				378505	GGCGGTAGAGGTTGGGGGGTTGGGC
			370539	GCGGTGGGTGGGTGGTGTGGTTGGA				587960	GCAGGGTGTGGTTGGGGGGTTGGAC
			584433	GGGTGGTGTGGTTGGGGGGCGGGTA				577636	GCAGTAGGGGGTTGGGGGGTTGGAC
			595183	CAAAAGGTAGGGTGGTGTGGTTGGG				579182	GGCGTCGGACGGTTGGGGGGTTGGG
			613990	TGCAGGGAGGGGTGGTGTGGTTGGG				572825	GCAGGGAGTGGTTGGGGGGTTGGAG
			507332	ACATGGTTGGGGTGGTGTGGTTGGC				602492	GGGTTGGGGGGTTGGAGTAGCATGA
			488222	GGGTGGTGTGGTTGGGGGCGGGAGA				602973	GTGCATATGGGTTGGGGGGTTGGGA
			492638	CCGCGGCTGGGGTGGTGTGGTTGGA				508423	TCGAGCATAGGTTGGGGGGTTGGGC
			551404	GGGTGGTGTGGTTGGCTGATGTAGC				519512	GGCGATGTGGGTTGGGGGGTTGGGG
			537335	GAGGCCGGTGGGTGGTGTGGTTGGT				512063	ATTAAGCTGGGTTGGGGGGTTGGGC
			105998	GGGTGGTGTGGTTGGGCATTGCGTA				490377	GCGAAGACTGGTTGGGGGGTTGGTT
			89023	CATGCGGACGGGTGGTGTGGTTGGA				497600	ACTCGGCGTGGTTGGGGGGTTGGAG
			90082	GGGTGGTGTGGTTGGAACTGCGCGA				547680	GGTGGCAGTGGTTGGGGGGTTGGAT
			80782	GGGGGCGAAGGGTGGTGTGGTTGGA				549211	GGTGCACTGGGTTGGGGGGTTGGGG
			90226	GGGAGGCGAGGGTGGTGTGGTTGGT				551196	AGAACAGGTGGTTGGGGGGTTGGGA
			91328	AGCGGAGGTGGGTGGTGTGGTTGGC				100677	GCTCTGGTCGGGTTGGGGGGTTGGA
			92907	GCCGGGGTGGTGTGGTTGGCTAGAT				80615	CGGTTGGGGGGTTGGAGCTTTCGGT
			156579	TGGTGCAGGTGGTGGTGTGGTTGGC				142965	GGGTTGGGGGGTTGGGTAAACCTGA
			138571	GGGGAGCAGGGGTGGTGTGGTTGGA				158698	GCAAGAGTGGGTTGGGGGGTTGGTT
			3045	CGTGAGTGTGGGTGGTGTGGTTGGG				153177	GGGTTGGGGGGTTGGGTAGAACTAG
			3346	GGGGTCAATGGGTGGTGTGGTTGGC				140104	ACGGTTGGGGGGTTGGGAGCGTTTG
			67927	GGTGTAAGGGGGTGGTGTGGTTGGA				39887	GCGGTTGGGGGGTTGGGCGTGCTGG
			76166	GGCAGAGTTCGGTGGTGTGGTTGGC				39852	GTGTGAGTAGGTTGGGGGGTTGGCA
			54366	GGGCGGCAGGGGTGGTGTGGTTGGC				38626	CGGTTGGGGGGTTGGGGAAATGCAA
			268325	ACGGTGGTGTGGTTGGTGGAAGACC				32651	TCCGAGGTGGGTTGGGGGGTTGGGT
			274882	GGGATAGGTGGGTGGTGTGGTTGGT				4819	ACGGTTGGGGGGTTGGGAGGATCAA
			249839	GGGTGGTGTGGTTGGAAAGGGGGTG				16777	ATCCGCGCAGGTTGGGGGGTTGGGG
			314622	GGGTGGTGTGGTTGGCGCTTCGAGA				18353	GGGTTGGGGGGTTGGGCGTGCTACT
			290028	GTGGAGGGGTGGTGTGGTTGGCATC				11815	TGTGGCGTAGGTTGGGGGGTTGGAC
			225353	GGGTGGTGTGGTTGGGGTGCGTGTG				262580	AGTGTGGTGGGTTGGGGGGTTGGAT
			219137	AGCGGAATAGGGTGGTGTGGTTGGG				247562	GAGAGAAGCGGTTGGGGGGTTGGAT
								244804	GGGTTGGGGGGTTGGTGGTCAGTGA
								289202	GCACAAGGTGGTTGGGGGGTTGGCA
								176284	AGGTTGGGGGGTTGGGTCTTGCAGA
								178195	GCCGAAGTTGGTTGGGGGGTTGGGA
								224540	GCAGGGCATGGTTGGGGGGTTGGCG
								206323	GGGTTGGGGGGTTGGGAGCGAAGGA
								211162	GGTGGGGTTGGTTGGGGGGTTGGCT
kmer15 seed				seed ggatggtgtgggtgg (2nd)					seed gggtggtgtggttgg (top)
ggatggtgtgggtgg			437644	ACAGGGATGGTGTGGGTGGCGTCGC				462526	GGGTGGTGTGGTTGGGAACGTCGAG
gggtggtgtggttgg			408186	TAATAGGGTGGATGGTGTGGGTGGT				461177	GAGTGCAGAGGGTGGTGTGGTTGGG
			404985	GAGTAGTAGGGATGGTGTGGGTGGC				442228	GACGGGGTGGTGTGGTTGGCGATGG
			471465	GTCCTGTGAGGATGGTGTGGGTGGA				444192	GGTGGAGGGGGGTGGTGTGGTTGGA
			360124	GCCAATGCAGGATGGTGTGGGTGGT				455298	ACCGAAGCGGGGTGGTGTGGTTGGC
			380752	TGCTTAAGGGGATGGTGTGGGTGGG				322784	GGGGTGGTGTGGTTGGGGCGTCCCC
			593449	AAACCCGGCGGATGGTGTGGGTGGG				337428	GGGCGGGTGGTGTGGTTGGAGGGCC
			562709	GCTAGGATGGTGTGGGTGGGTGGCA				393683	GGGGTGGTGTGGTTGGGGGTGGTGT
			625379	AATGCAGCAGGATGGTGTGGGTGGG				394299	GTCCTCGGCGGGTGGTGTGGTTGGG
			632663	GGGGTGCTCGGATGGTGTGGGTGGC				370539	GCGGTGGGTGGGTGGTGTGGTTGGA
			633624	CGAACGAATGGATGGTGTGGGTGGG				584433	GGGTGGTGTGGTTGGGGGGCGGGTA
			633884	TGGGAAGCAGGATGGTGTGGGTGGC				595183	CAAAAGGTAGGGTGGTGTGGTTGGG
			617165	GGGTGAGAAGGATGGTGTGGGTGGT				613990	TGCAGGGAGGGGTGGTGTGGTTGGG
			524047	AAATGCGGATGGTGTGGGTGGGAAT				507332	ACATGGTTGGGGTGGTGTGGTTGGC
			119560	CGGTATAGCGGATGGTGTGGGTGGG				488222	GGGTGGTGTGGTTGGGGGCGGGAGA
			125327	AACGGCGGTGGATGGTGTGGGTGGT				492638	CCGCGGCTGGGGTGGTGTGGTTGGA
			135266	TGGCTGGTGGGATGGTGTGGGTGGC				551404	GGGTGGTGTGGTTGGCTGATGTAGC
			39604	GACGGATGGGGATGGTGTGGGTGGG				537335	GAGGCCGGTGGGTGGTGTGGTTGGT
			34189	TGCCCAAGGGGATGGTGTGGGTGGG				105998	GGGTGGTGTGGTTGGGCATTGCGTA
			66264	TGGGTAGGGGGATGGTGTGGGTGGC				89023	CATGCGGACGGGTGGTGTGGTTGGA
			61067	GAGTCGGTGGGATGGTGTGGGTGGC				90082	GGGTGGTGTGGTTGGAACTGCGCGA
			273666	TGGACGGCAGGATGGTGTGGGTGGG				80782	GGGGGCGAAGGGTGGTGTGGTTGGA
			241155	GAAGGAGAGGGATGGTGTGGGTGGA				90226	GGGAGGCGAGGGTGGTGTGGTTGGT
			258209	ACGGGGGAGGGATGGTGTGGGTGGA				91328	AGCGGAGGTGGGTGGTGTGGTTGGC
			308051	GCGGAATAGGGATGGTGTGGGTGGC				92907	GCCGGGGTGGTGTGGTTGGCTAGAT
			287661	TGCGGCGGGGGATGGTGTGGGTGGA				138571	GGGGAGCAGGGGTGGTGTGGTTGGA
			198507	GGATGGTGTGGGTGGGGAGGGGAAC				3045	CGTGAGTGTGGGTGGTGTGGTTGGG
			210903	GAATGGCTAGGATGGTGTGGGTGGT				3346	GGGGTCAATGGGTGGTGTGGTTGGC
								67927	GGTGTAAGGGGGTGGTGTGGTTGGA
								54366	GGGCGGCAGGGGTGGTGTGGTTGGC
								274882	GGGATAGGTGGGTGGTGTGGTTGGT
								249839	GGGTGGTGTGGTTGGAAAGGGGGTG
								314622	GGGTGGTGTGGTTGGCGCTTCGAGA
								290028	GTGGAGGGGTGGTGTGGTTGGCATC
								225353	GGGTGGTGTGGTTGGGGTGCGTGTG
								219137	AGCGGAATAGGGTGGTGTGGTTGGG
kmer16 seed				seed gggtggtgtggttggg (2nda)					seed ggggtggtgtggttgg (2ndb)					seed ggggtggtgtgggtgg (top)
gggtggtgtggttggg			462526	GGGTGGTGTGGTTGGGAACGTCGAG				442228	GACGGGGTGGTGTGGTTGGCGATGG				403166	AGATAGGCGGGGTGGTGTGGGTGGC
ggggtggtgtggttgg			461177	GAGTGCAGAGGGTGGTGTGGTTGGG				444192	GGTGGAGGGGGGTGGTGTGGTTGGA				340904	TGGTGCGGGGGGTGGTGTGGGTGGC
ggggtggtgtgggtgg			322784	GGGGTGGTGTGGTTGGGGCGTCCCC				455298	ACCGAAGCGGGGTGGTGTGGTTGGC				368025	GGGTAGGGGTGGTGTGGGTGGCATC
			393683	GGGGTGGTGTGGTTGGGGGTGGTGT				322784	GGGGTGGTGTGGTTGGGGCGTCCCC				592028	TTGAGGGGGTGGTGTGGGTGGTTTA
			394299	GTCCTCGGCGGGTGGTGTGGTTGGG				393683	GGGGTGGTGTGGTTGGGGGTGGTGT				612030	GTGCCTGGGGGGTGGTGTGGGTGGC
			584433	GGGTGGTGTGGTTGGGGGGCGGGTA				613990	TGCAGGGAGGGGTGGTGTGGTTGGG				501960	GGGATGGGGTGGTGTGGGTGGAAGG
			595183	CAAAAGGTAGGGTGGTGTGGTTGGG				507332	ACATGGTTGGGGTGGTGTGGTTGGC				137208	AGGTCGCAGGGGTGGTGTGGGTGGC
			613990	TGCAGGGAGGGGTGGTGTGGTTGGG				492638	CCGCGGCTGGGGTGGTGTGGTTGGA				32465	GCTGGGGTGGTGTGGGTGGGTTTGT
			488222	GGGTGGTGTGGTTGGGGGCGGGAGA				92907	GCCGGGGTGGTGTGGTTGGCTAGAT				71210	GGAGAGCAGGGGTGGTGTGGGTGGC
			105998	GGGTGGTGTGGTTGGGCATTGCGTA				138571	GGGGAGCAGGGGTGGTGTGGTTGGA				317549	GGTGACGAGGGGTGGTGTGGGTGGA
			3045	CGTGAGTGTGGGTGGTGTGGTTGGG				67927	GGTGTAAGGGGGTGGTGTGGTTGGA				197649	CAGGCGGTGGGGTGGTGTGGGTGGC
			225353	GGGTGGTGTGGTTGGGGTGCGTGTG				54366	GGGCGGCAGGGGTGGTGTGGTTGGC				174026	GTTACATAGGGGTGGTGTGGGTGGT
			219137	AGCGGAATAGGGTGGTGTGGTTGGG				290028	GTGGAGGGGTGGTGTGGTTGGCATC				230270	AGCAGCAGGGGGTGGTGTGGGTGGC
													229209	AGACTGCTGGGGTGGTGTGGGTGGC
kmer17 seed				seed gggtggggaggatggtg (2nd)					seed ggggtggtgtgggtggc (top)
gggtggggaggatggtg			424684	GGGTGGGGAGGATGGTGTTGGAAGA				403166	AGATAGGCGGGGTGGTGTGGGTGGC
ggggtggtgtgggtggc			405282	GGGTGGGGAGGATGGTGGTTAGGGT				340904	TGGTGCGGGGGGTGGTGTGGGTGGC
			475105	GGGTGGGGAGGATGGTGGCTGGATA				368025	GGGTAGGGGTGGTGTGGGTGGCATC
			559576	GGGTGGGGAGGATGGTGTGGGTGAA				612030	GTGCCTGGGGGGTGGTGTGGGTGGC
			16752	GGGTGGGGAGGATGGTGGAGATTTG				137208	AGGTCGCAGGGGTGGTGTGGGTGGC
			10532	GGGTGGGGAGGATGGTGACCTGTTC				71210	GGAGAGCAGGGGTGGTGTGGGTGGC
			61717	GGGTGGGGAGGATGGTGGGGTTAGG				197649	CAGGCGGTGGGGTGGTGTGGGTGGC
								230270	AGCAGCAGGGGGTGGTGTGGGTGGC
								229209	AGACTGCTGGGGTGGTGTGGGTGGC
kmer 18 seed				seed gtggatggtggggttggt					seed ggtggttggtgtgggtgg					seed ggtgggtggtgtggttgg
gtggatggtggggttggt			388110	GAAGGGGGTGGATGGTGGGGTTGGT				468719	CCTGAAGGTGGTTGGTGTGGGTGGA				370539	GCGGTGGGTGGGTGGTGTGGTTGGA
ggtggttggtgtgggtgg			631166	TGCGAAGGTGGATGGTGGGGTTGGT				623741	CGCTGAGGTGGTTGGTGTGGGTGGG				537335	GAGGCCGGTGGGTGGTGTGGTTGGT
ggtgggtggtgtggttgg			558279	CAGGGCAGTGGATGGTGGGGTTGGT				100466	GCTGCAGGTGGTTGGTGTGGGTGGC				91328	AGCGGAGGTGGGTGGTGTGGTTGGC
ggtggatggtggggttgg			219744	AGGCAAGGTGGATGGTGGGGTTGGT				227153	AAGCAGGGTGGTTGGTGTGGGTGGT				274882	GGGATAGGTGGGTGGTGTGGTTGGT
gggtggggaggatggtgg
gggggatggtgtggttgg				seed gggtggggaggatggtgg					seed gggggatggtgtggttgg					seed gcaggatggtgtgggtgg
gcaggatggtgtgggtgg			405282	GGGTGGGGAGGATGGTGGTTAGGGT				407867	GTTGCAGGGGGATGGTGTGGTTGGT				360124	GCCAATGCAGGATGGTGTGGGTGGT
			475105	GGGTGGGGAGGATGGTGGCTGGATA				513990	AGGGCAGGGGGATGGTGTGGTTGGT				625379	AATGCAGCAGGATGGTGTGGGTGGG
			16752	GGGTGGGGAGGATGGTGGAGATTTG				70850	GCCGAGGGGGGATGGTGTGGTTGGG				633884	TGGGAAGCAGGATGGTGTGGGTGGC
			61717	GGGTGGGGAGGATGGTGGGGTTAGG				205183	AGCACAGGGGGATGGTGTGGTTGGG				273666	TGGACGGCAGGATGGTGTGGGTGGG
				seed ggtggatggtggggttgg
			388112	GAAGGGGGTGGATGGTGGGGTTGGT
			631162	TGCGAAGGTGGATGGTGGGGTTGGT
			18291	AATGCTGGTGGATGGTGGGGTTGGA
			219744	AGGCAAGGTGGATGGTGGGGTTGGT

## Sheet: AFS10K
Thrombin_AFS 10K kmer analysis
73254/82084 reads accepted
Unique and nonunique kmer distribution
unique kmer		nonunique kmer	kmer		kmer
8 631			8 64693		8
9 41503			9 192623		9
10 287836			10 270459		10
11 657863			11 180212		11
12 870135			12 71877		12
13 907088			13 21925		13
14 866457			14 6199		14
15 802131			15 1807		15
16 731157			16 687		16
17 658552			17 367		17
18 585508			18 262		18
19 512348			19 215		19
20 439164			20 180		20
21 365974			21 148		21
22 292782			22 117		22
23 219588			23 87		23
24 146394			24 57		24
25 73198			25 28		25
Counts for each kmer top and 2nd seeds are highlighted
kmer 10		kmer 11		kmer 12		kmer 13		kmer 14		kmer 15		kmer 16		kmer 17
1 287836		1 657863		1 870135		1 907088		1 866457		1 802131		1 731157		1 658552
2 134108		2 130683		2 62813		2 20749		2 6038		2 1767		2 679		2 367
3 62183		3 32674		3 7262		3 1027		3 140		3 34		3 7
4 30870		4 9884		4 1321		4 121		4 14		4 4		gtggcttcgttgactt
5 16579		5 3830		5 295		5 19		5 4		5 1		ggttggggggttggtc
6 9259		6 1531		6 113		6 7		6 2		gggtggtgtgggtgg		gggttggagtggttgg
7 5767		7 745		7 41		ttggtgtggttgg		gttggtgtggttgg		6 1		gggtggtgtgggtggc
8 3511		8 352		8 18		gttggtgtggttg		ggttggtgtggttg		ggttggtgtggttgg		gggtggtgggggtgga
9 2344		9 187		9 7		ggttggtgtggtt		7 1				gggatggtgggggtgg
10 1527		10 110		10 5		gggtggtgtgggt		ggatggggggttgg				ggatggggggttgggg
11 1110		11 67		11 1		gggtgggggggtt						4 1
12 786		12 42		gggtgggggggt		ggggtggtgtggg						cggttggtgtggttgg
13 544		13 36		17 1		atggtgtgggtgg
14 422		14 19		tggtgtgggtgg		7 2
15 337		15 21				ggatggggggttg
16 206		16 12				gatggggggttgg
17 198		17 2
18 135		18 4
19 106		19 4
20 89		21 1
21 72		22 1
22 48		23 5
23 37		25 1
24 26		ggtgtgggtgg
25 38		26 1
26 22		gggggggtggt
27 18
28 17
29 13
30 12
31 4
32 7
33 9
34 8
35 5
36 5
37 3
38 4
39 3
40 1
41 5
42 3
43 3
44 3
45 3
46 1
48 2
49 2
50 1
52 1
61 1
ggggggttgg
62 1
gggggggtgg
NGS reads searched for the Kmer top and 2nd seed sequences
kmer 10 seeds
ggggggttgg			seed ggggggttgg (2nd)				seed gggggggtgg (top)
gggggggtgg							190554	GGGGGGGTGGGGTGGCATGGGCCCG
							191007	GCGGGGGGGTGGTTCGCGGGGTAGA
							189560	GCGGGGGGGTGGTCTTAAAGGGCTT
							189661	AATGCGGGGGGGTGGGAGGGTGGGT
							188907	GTGGGGGGGTGGTGGGGCGGCAAGC
							189004	AACCGGGGGGGGTGGTTCGTGTGCC
							192230	GCAGTGGGGGGGTGGTGCCATATCG
							192672	GGTGCAGGGGTTTGGGGGGGGTGGA
							181411	CGCACGGGGGGGTGGTGCCGGCGTA
							180834	GGAGCGGGGGGGTGGCATTAACGAT
							182441	GGGGGGGTGGTTTGCGTTTCCACGG
							178882	GCAGGGGGGGGGTGGCTTGGGGCCC
							180658	GGCCGGGGGGGGTGGAGCACGCTGA
							179580	ACACTGGGGGGGTGGCCGGGGGGGG
							184833	GGCCCGGGGGGGTGGACATCGTGAT
							184174	GGTTAGGGGGGGTGGACGCCGAATG
							214667	GCGGGGGGGGGGTGGGTATGGCGTG
							211085	GGTGCGGGGGGGTGGTAGGGGTGGT
							211036	TGCAGCGCGGATTGGGGGGGGTGGT
							211357	GGGGGGGTGGTGTCGGCACAGGATG
							210636	ACGTTGGGGGAGTGGGGGGGTGGGT
							210905	GCGCGGGGGGGGTGGCAAGATAGAC
							212335	AACGATAATGGGTGGGGGGGTGGAT
							212546	ACTCGGGGGGGGTGGGTAGTCATGA
							212544	GGGGGGGGGTGGTGATCATGCAGGT
							197358	GAGTCAGGTGGTTGGGGGGGTGGTG
							197187	CGTGGGGGGGGGTGGGACCAGCGTA
							198797	TAAGGCCGGCAATTGGGGGGGTGGT
							204131	GGGGGGGTGGCTTGGAGCAGGTGGT
							204787	GGGGTGGGGGGGTGGGATGGATAGG
							201583	AAGTCGGGGGGGTGGGGCTTTTTCT
							201609	GGTGATTGGGATTGGGGGGGTGGGT
							158916	AAGGAGGGGGGGTGGGTCCTTAGGT
							158169	GCGCGCGGGTAGTCGGGGGGGTGGT
							159768	ACGGGCTCTGGTTGGGGGGGTGGTA
							156505	ACGGGGGGGTGGTCACATTGTCCAG
							157754	GGTGTAGACGATTGGGGGGGGGTGG
							156815	AGGGGGGGGTGGTTATGGAACGAGC
							145147	GAGTGGGGGGGGTGGAAGGGGAGTA
							144321	CCAGCGCGTGACTAGGGGGGGTGGA
							144232	ACTGAGCTGGGATGGGGGGGTGGGT
							141944	GAAGGAAGACGGTGGGGGGGGTGGA
							143352	TCAGGGGGGGGGTGGGAGGTATGTA
							150605	GGGGGGGTGGGCTCGCGATGGGGCT
							147201	GGGGAGGGGGGGTGGAAAGGGAGGT
							146991	AGGGGGGGGTGGTAGACATGGCCGC
							169497	CAAAAGGGGGGGTGGTCAAAGGAAG
							171252	GGGGGGGTGGTTCAAGGCGCGAAAG
							171046	GGGGGGGTGGTCTTGGCCCGGCTTG
							170962	CGGGGGGGGTGGTACACGTGCTTTT
							176281	TGGGGGGGTGGGTTTATTGAAGGCT
							178171	GACGGGGGGGGGTGGCCGGAGGCGC
							177403	GGGGGGGTGGTCTCCGGTCCGATGT
							175609	GCCGTGGGGGGGTGGCCGACATTTG
							175913	GGGGGGGGTGGGTGTGGATGTACTT
							160700	CAGCGGGCGCCCTGGGGGGGTGGTT
							160758	AGGTGGGGGGGGTGGAGGGCCGCTC
							162113	TGAATGGGGGGGTGGCCGTGCTCCA
							167715	GGTTGGGGGGGGTGGTGGGGGAAGT
							167093	TGGCTAGGGTCCTGGGGGGGGTGGA
							168338	GGGGGGGGGTGGTCCGGCAGGACGT
							168139	CGAGCGGGGGGGTGGAGACTGGCTG
kmer 11 seed		seed gggggggtggt (top)				seed ggtgtgggtgg (2nd)
ggtgtgggtgg		191007	GCGGGGGGGTGGTTCGCGGGGTAGA			191007	GCGGGGGGGTGGTTCGCGGGGTAGA
gggggggtggt		189560	GCGGGGGGGTGGTCTTAAAGGGCTT			189560	GCGGGGGGGTGGTCTTAAAGGGCTT
		188907	GTGGGGGGGTGGTGGGGCGGCAAGC			188907	GTGGGGGGGTGGTGGGGCGGCAAGC
		189004	AACCGGGGGGGGTGGTTCGTGTGCC			189004	AACCGGGGGGGGTGGTTCGTGTGCC
		192230	GCAGTGGGGGGGTGGTGCCATATCG			192230	GCAGTGGGGGGGTGGTGCCATATCG
		181411	CGCACGGGGGGGTGGTGCCGGCGTA			181411	CGCACGGGGGGGTGGTGCCGGCGTA
		182441	GGGGGGGTGGTTTGCGTTTCCACGG			182441	GGGGGGGTGGTTTGCGTTTCCACGG
		211085	GGTGCGGGGGGGTGGTAGGGGTGGT			211085	GGTGCGGGGGGGTGGTAGGGGTGGT
		211036	TGCAGCGCGGATTGGGGGGGGTGGT			211036	TGCAGCGCGGATTGGGGGGGGTGGT
		211357	GGGGGGGTGGTGTCGGCACAGGATG			211357	GGGGGGGTGGTGTCGGCACAGGATG
		212544	GGGGGGGGGTGGTGATCATGCAGGT			212544	GGGGGGGGGTGGTGATCATGCAGGT
		197358	GAGTCAGGTGGTTGGGGGGGTGGTG			197358	GAGTCAGGTGGTTGGGGGGGTGGTG
		198797	TAAGGCCGGCAATTGGGGGGGTGGT			198797	TAAGGCCGGCAATTGGGGGGGTGGT
		158169	GCGCGCGGGTAGTCGGGGGGGTGGT			158169	GCGCGCGGGTAGTCGGGGGGGTGGT
		159768	ACGGGCTCTGGTTGGGGGGGTGGTA			159768	ACGGGCTCTGGTTGGGGGGGTGGTA
		156505	ACGGGGGGGTGGTCACATTGTCCAG			156505	ACGGGGGGGTGGTCACATTGTCCAG
		156815	AGGGGGGGGTGGTTATGGAACGAGC			156815	AGGGGGGGGTGGTTATGGAACGAGC
		146991	AGGGGGGGGTGGTAGACATGGCCGC			146991	AGGGGGGGGTGGTAGACATGGCCGC
		169497	CAAAAGGGGGGGTGGTCAAAGGAAG			169497	CAAAAGGGGGGGTGGTCAAAGGAAG
		171252	GGGGGGGTGGTTCAAGGCGCGAAAG			171252	GGGGGGGTGGTTCAAGGCGCGAAAG
		171046	GGGGGGGTGGTCTTGGCCCGGCTTG			171046	GGGGGGGTGGTCTTGGCCCGGCTTG
		170962	CGGGGGGGGTGGTACACGTGCTTTT			170962	CGGGGGGGGTGGTACACGTGCTTTT
		177403	GGGGGGGTGGTCTCCGGTCCGATGT			177403	GGGGGGGTGGTCTCCGGTCCGATGT
		160700	CAGCGGGCGCCCTGGGGGGGTGGTT			160700	CAGCGGGCGCCCTGGGGGGGTGGTT
		167715	GGTTGGGGGGGGTGGTGGGGGAAGT			167715	GGTTGGGGGGGGTGGTGGGGGAAGT
		168338	GGGGGGGGGTGGTCCGGCAGGACGT			168338	GGGGGGGGGTGGTCCGGCAGGACGT
kmer 12 seed		seed tggtgtgggtgg (top)				seed gggtgggggggt (2nd)
gggtgggggggt		188339	TGGTGCAAAGGTTGGTGTGGGTGGA			195202	GGGTGGGGGGGTTGGAGAGTGGTAC
tggtgtgggtgg		188135	TCCGGGGTGGTGTGGGTGGTGGAGG			210099	GGGGTGGGGGGGTGAACGCGGCGAC
		189481	GGCGAAAATGGTTGGTGTGGGTGGA			214829	ACGGGGTATGGGTGGGGGGGTGATG
		181948	GTGTGTGGCGGATGGTGTGGGTGGG			212335	AACGATAATGGGTGGGGGGGTGGAT
		179385	CGGGTGGGAGGATGGTGTGGGTGGA			199491	GGGTGGGGGGGTTGGCGGGTGCAGG
		213639	GGGTCGTGTTATTGGTGTGGGTGGG			204787	GGGGTGGGGGGGTGGGATGGATAGG
		199356	GACGTAATGGTGTGGGTGGTTGGAG			202052	GGGTGGGGGGGTTTGTCTCCTGAGT
		203709	GGTGCGCTAGGGTGGTGTGGGTGGT			154980	GGGTGGGGGGGTTGGCTCGTTTGTT
		205081	ACGTTGGCGGGTTGGTGTGGGTGGT			155533	GGGGTGGGGGGGTAGGCTAGCTAGA
		155099	GGTGTCGCGGTCTGGTGTGGGTGGA			142477	GAGCGGGGTGGGTGGGGGGGTTGAT
		158544	GATGCAGAGGGATGGTGTGGGTGGT			147483	GGGGTGGGGGGGTTCCCAAGGGCAG
		143103	GCCTGTACATGGTGTGGGTGGGCAC
		177711	GGAGGATAAGGGTGGTGTGGGTGGC
		162964	GGCATGTGGGGGTGGTGTGGGTGGC
		161894	GTATGTAAGGGCTGGTGTGGGTGGG
		167690	GGAGGGATGGTGTGGGTGGCACTGT
		168286	GGGTGGTGTGGGTGGCGGGTTGGTT
kmer 13 seed		seed gatggggggttgg (topa)				seed ggatggggggttg (topb)
ggatggggggttg		179315	GTATCACCGGGATGGGGGGTTGGGG			179315	GTATCACCGGGATGGGGGGTTGGGG
gatggggggttgg		179669	AGGCTAGCGGGATGGGGGGTTGGCG			179669	AGGCTAGCGGGATGGGGGGTTGGCG
		206466	ACAGCGAGTGGATGGGGGGTTGGGG			206466	ACAGCGAGTGGATGGGGGGTTGGGG
		151472	CGTGCGCTAGGATGGGGGGTTGGGG			151472	CGTGCGCTAGGATGGGGGGTTGGGG
		159767	GCACTGTTAGGATGGGGGGTTGGAG			159767	GCACTGTTAGGATGGGGGGTTGGAG
		145648	GGCGCGGTGGGATGGGGGGTTGGCG			145648	GGCGCGGTGGGATGGGGGGTTGGCG
		144028	CGGCGCTACGGATGGGGGGTTGGTA			144028	CGGCGCTACGGATGGGGGGTTGGTA
kmer 14 seed		seed ggatggggggttgg (top)				seed ggttggtgtggttg (2nda)					seed gttggtgtggttgg (2ndb)
gttggtgtggttgg		179315	GTATCACCGGGATGGGGGGTTGGGG			208433	CGGCATGGCGGTTGGTGTGGTTGGT				208433	CGGCATGGCGGTTGGTGTGGTTGGT
ggttggtgtggttg		179669	AGGCTAGCGGGATGGGGGGTTGGCG			214507	GCGGGGGTCGGTTGGTGTGGTTGGG				214507	GCGGGGGTCGGTTGGTGTGGTTGGG
ggatggggggttgg		206466	ACAGCGAGTGGATGGGGGGTTGGGG			158962	ACTGCCGGTTGGTGTGGTTGGTTCA				158962	ACTGCCGGTTGGTGTGGTTGGTTCA
		151472	CGTGCGCTAGGATGGGGGGTTGGGG			144672	CCATAGGGTTGGTGTGGTTGGCAAC				144672	CCATAGGGTTGGTGTGGTTGGCAAC
		159767	GCACTGTTAGGATGGGGGGTTGGAG			150819	ACTTGCGGCGGTTGGTGTGGTTGGA				150819	ACTTGCGGCGGTTGGTGTGGTTGGA
		145648	GGCGCGGTGGGATGGGGGGTTGGCG			147343	ACAGGCGAGGGTTGGTGTGGTTGGC				147343	ACAGGCGAGGGTTGGTGTGGTTGGC
		144028	CGGCGCTACGGATGGGGGGTTGGTA
kmer 15 seed		seed gggtggtgtgggtgg (top)				seed gggtggtgtgggtgg (2nd)
gggtggtgtgggtgg		188135	TCCGGGGTGGTGTGGGTGGTGGAGG			188135	TCCGGGGTGGTGTGGGTGGTGGAGG
ggttggtgtggttgg		203709	GGTGCGCTAGGGTGGTGTGGGTGGT			203709	GGTGCGCTAGGGTGGTGTGGGTGGT
		177711	GGAGGATAAGGGTGGTGTGGGTGGC			177711	GGAGGATAAGGGTGGTGTGGGTGGC
		162964	GGCATGTGGGGGTGGTGTGGGTGGC			162964	GGCATGTGGGGGTGGTGTGGGTGGC
		168286	GGGTGGTGTGGGTGGCGGGTTGGTT			168286	GGGTGGTGTGGGTGGCGGGTTGGTT
kmer 16 seed		seed cggttggtgtggttgg (top)
cggttggtgtggttgg		208433	CGGCATGGCGGTTGGTGTGGTTGGT
		214507	GCGGGGGTCGGTTGGTGTGGTTGGG
		158962	ACTGCCGGTTGGTGTGGTTGGTTCA
		150819	ACTTGCGGCGGTTGGTGTGGTTGGA
